# Supplementary material
Source: Springer Nature journal article supplement (https://www.springermedizin.de/resource/supplementary/12916_2012_630_MOESM3_ESM.pdf/9597988)

Total

Men

Women

All affective disorders

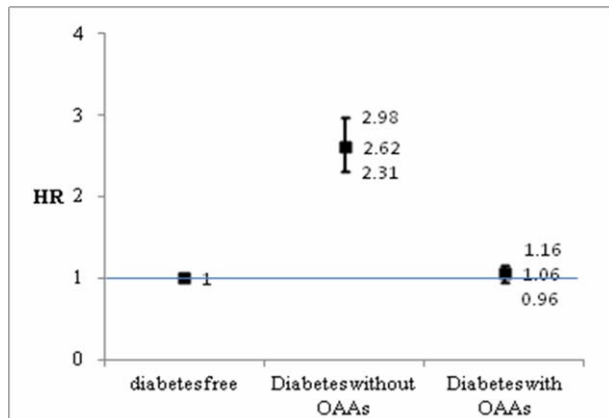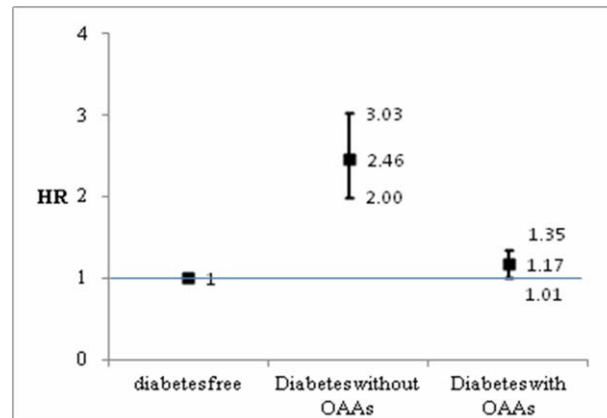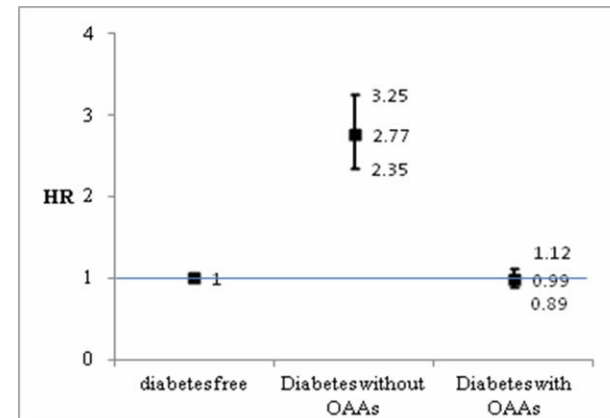

Unipolar

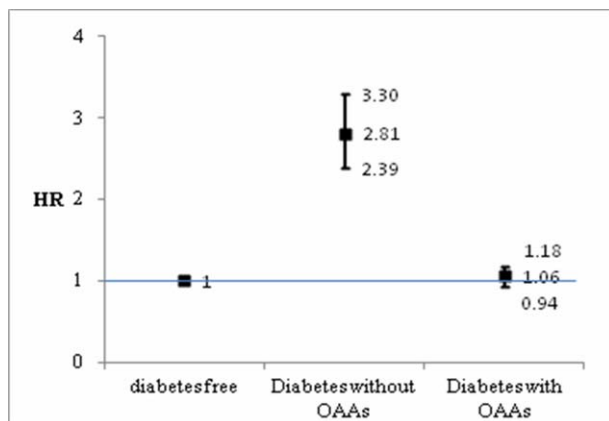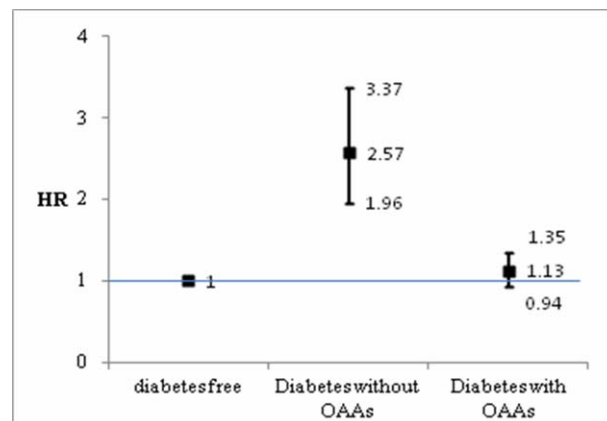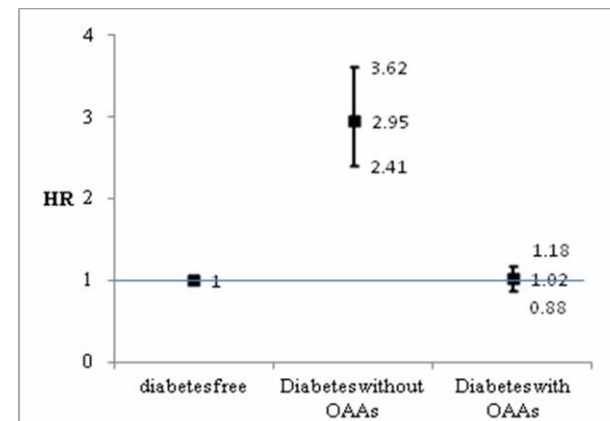

Bipolar

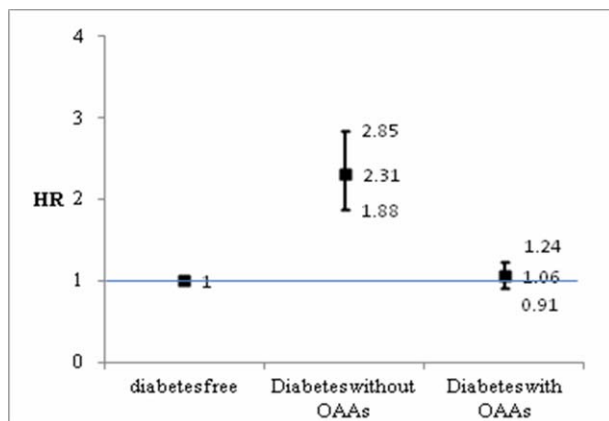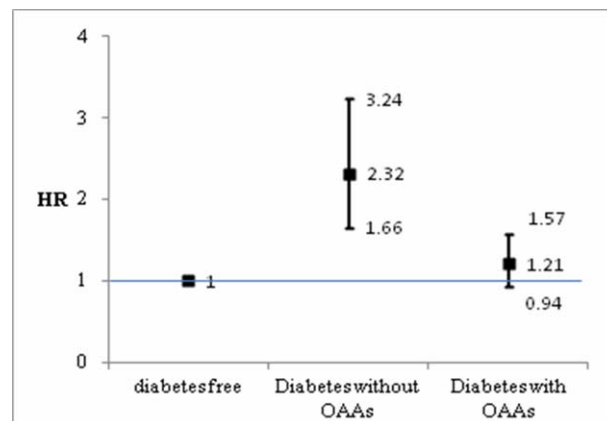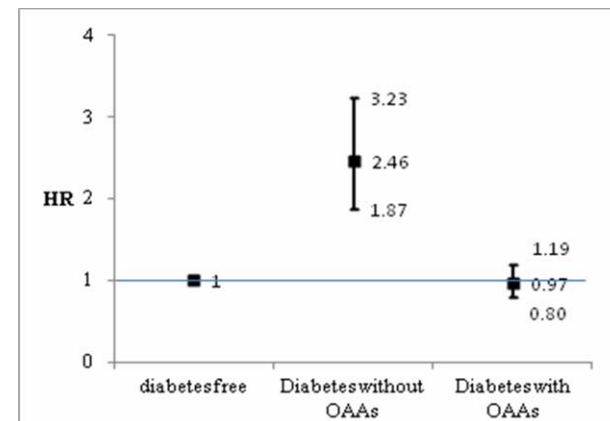

Supplement: MOESM3 [file 9597988]
